# Supplementary material for: Uranium isotopic analysis in unpurified solutions by ICP-MS
Source: Royal Society of Chemistry journal article supplement (doi:10.1039/d4ja00130c), 2024-01-01
Supplement: d4ja00130c1.xlsx [file d4ja00130c1.xlsx]

## Sheet: Agilent 8900
Supplementary Data Table File
All analytical data
Instrument	Purification	Introduction	Method	235U/238U	± (1σ)	234U/238U	± (1σ)
Agilent 8900	AG1-X8	Spray Chamber	Single Q	0.0072238	0.000142894	6.4739e-05	5.62393e-06
Agilent 8900	UTEVA	Spray Chamber	Single Q	0.00724121	0.000140466	6.52632e-05	6.044e-06
Agilent 8900	none	Spray Chamber	Single Q	0.00718241	0.00016864	6.76736e-05	7.28695e-06
Agilent 8900	AG1-X8	Spray Chamber	TQ - NO	0.0072775	0.000138901	6.69394e-05	1.09242e-05
Agilent 8900	UTEVA	Spray Chamber	TQ - NO	0.00726715	0.000136786	6.42691e-05	1.04592e-05
Agilent 8900	none	Spray Chamber	TQ - NO	0.0072698	0.000150975	6.47544e-05	1.2278e-05

## Sheet: iCAP
Supplementary Data Table File
All analytical data
Instrument	Purification	Introduction	Method	235U/238U	± (1σ)	234U/238U	± (1σ)
iCAP	AG1-X8	Aridus II	SQ	0.00726569	3.84524e-05	6.2614e-05	1.97409e-06
iCAP	AG1-X8	Aridus II	SQ	0.00729484	6.00067e-05	6.33987e-05	3.49001e-06
iCAP	AG1-X8	Aridus II	SQ	0.00729581	9.42176e-05	6.52927e-05	2.83048e-06
iCAP	UTEVA	Aridus II	SQ	0.00724891	7.65324e-05	6.34676e-05	2.22047e-06
iCAP	UTEVA	Aridus II	SQ	0.00724845	0.000100526	6.46777e-05	1.30552e-06
iCAP	UTEVA	Aridus II	SQ	0.00730684	7.63521e-05	6.37869e-05	1.77523e-06
iCAP	none	Spray Chamber	SQ	0.00734482	0.000137847	7.09237e-05	1.22606e-05
iCAP	none	Spray Chamber	SQ	0.00725136	0.000128544	7.64773e-05	1.16709e-05
iCAP	none	Spray Chamber	SQ	0.00724457	0.000120341	7.86815e-05	1.53409e-05
iCAP	none	Aridus II	SQ	0.00727542	4.95191e-05	6.66769e-05	1.95467e-06
iCAP	none	Aridus II	SQ	0.0072588	7.55661e-05	6.46102e-05	3.65782e-06
iCAP	none	Aridus II	SQ	0.00725109	7.54485e-05	6.43831e-05	2.98906e-06
iCAP	none	Aridus II (rapid)	SQ	0.00725825	0.000117933	5.97086e-05	7.10583e-06
iCAP	none	Aridus II (rapid)	SQ	0.00728164	0.000175899	6.24397e-05	7.27402e-06
iCAP	none	Aridus II (rapid)	SQ	0.00729371	0.000170864	6.70209e-05	9.5476e-06
iCAP	AG1-X8	Aridus II	TQ - O2	0.00722698	7.16271e-05	6.26802e-05	2.54799e-06
iCAP	AG1-X8	Aridus II	TQ - O2	0.00723024	6.72138e-05	6.28733e-05	3.18204e-06
iCAP	AG1-X8	Aridus II	TQ - O2	0.0072167	7.2588e-05	6.32361e-05	3.6521e-06
iCAP	UTEVA	Aridus II	TQ - O2	0.00726521	6.1237e-05	6.44291e-05	2.4044e-06
iCAP	UTEVA	Aridus II	TQ - O2	0.00724116	8.73655e-05	6.33167e-05	2.10306e-06
iCAP	UTEVA	Aridus II	TQ - O2	0.0072492	7.30966e-05	6.13492e-05	2.64936e-06
iCAP	none	Spray Chamber	TQ - O2	0.00718572	0.000244287	5.11099e-05	1.59655e-05
iCAP	none	Spray Chamber	TQ - O2	0.00723635	0.000185948	5.34788e-05	2.48983e-05
iCAP	none	Spray Chamber	TQ - O2	0.0072078	0.000348822	6.01137e-05	1.8385e-05
iCAP	none	Aridus II	TQ - O2	0.00730713	7.22384e-05	6.38074e-05	5.90727e-06
iCAP	none	Aridus II	TQ - O2	0.00733367	0.000109209	6.35207e-05	3.6763e-06
iCAP	none	Aridus II	TQ - O2	0.00731331	8.96624e-05	6.63056e-05	2.77448e-06
iCAP	none	Aridus II (rapid)	TQ - O2	0.00719067	0.000105353	5.86251e-05	5.71076e-06
iCAP	none	Aridus II (rapid)	TQ - O2	0.00725842	0.000177119	6.70461e-05	6.37661e-06
iCAP	none	Aridus II (rapid)	TQ - O2	0.00720897	0.00014978	5.72626e-05	6.63045e-06

## Sheet: Neptune
Supplementary Data Table File
All analytical data
Instrument	Purification	Introduction	Method	235U/238U	± (1σ)	234U/238U	± (1σ)
Neptune	AG1-X8	Spray Chamber	Faraday - IC	0.00724811	7.94189e-07	6.30855e-05	4.50235e-07

## Sheet: Neoma
Supplementary Data Table File
All analytical data
Instrument	Purification	Introduction	Method	235U/238U	± (1σ)	234U/238U	± (1σ)
Neoma	AG1-X8	ApexΩ	Faraday	0.00725104	5.68804e-06	6.32422e-05	5.74525e-07
Neoma	AG1-X8	ApexΩ	Faraday	0.0072673	5.23511e-06	6.31661e-05	6.74924e-07
Neoma	AG1-X8	Spray chamber	MIC	0.00727782	7.93067e-05	6.01605e-05	8.07663e-06
Neoma	AG1-X8	Spray chamber	MIC	0.00724457	7.61667e-05	6.36597e-05	9.42202e-06
Neoma	AG1-X8	Spray chamber	MIC	0.00728838	8.00444e-05	6.68287e-05	8.64954e-06
Neoma	AG1-X8	Spray chamber	MIC	0.00725725	7.39198e-05	6.35277e-05	6.6273e-06
Neoma	AG1-X8	Spray chamber	MIC	0.00725817	0.000110213	6.62465e-05	1.25059e-06
Neoma	none	Spray chamber	MIC	0.00743837	0.000173867	9.11692e-05	2.27865e-05
Neoma	none	Spray chamber	MIC	0.00731978	0.000159145	7.16244e-05	1.72235e-05
Neoma	none	Spray chamber	MIC	0.00728261	7.5388e-05	7.1763e-05	9.26995e-06
Neoma	none	Spray chamber	MIC	0.00726712	5.40632e-05	6.85433e-05	6.59609e-06
Neoma	none	Spray chamber	MIC	0.00722955	4.83106e-05	6.975e-05	5.0435e-06

## Sheet: Neoma MSMS
Supplementary Data Table File
All analytical data
Instrument	Purification	Introduction	Method	235U/238U	± (1σ)	234U/238U	± (1σ)
Neoma MS/MS	AG1-X8	Spray chamber	MIC	0.00724467	0.000229014	6.54258e-05	7.32753e-06
Neoma MS/MS	AG1-X8	Spray chamber	SC	0.007253	9.76e-05	6.19e-05	7.64e-06
Neoma MS/MS	UTEVA	Spray chamber	SC	0.007231	9.12e-05	6.43e-05	6.64e-06
Neoma MS/MS	none	Spray chamber	SC	0.007216	0.000116742	6.48e-05	1.14e-05
Neoma MS/MS	AG1-X8	ApexΩ	Faraday	0.00725707	2.75827e-06	6.31219e-05	8.52572e-07
Neoma MS/MS	AG1-X8	ApexΩ	Faraday	0.00725348	3.39816e-06	6.23797e-05	1.07277e-06
Neoma MS/MS	AG1-X8	ApexΩ	Faraday	0.00726421	2.86519e-06	6.30113e-05	8.79417e-07
Neoma MS/MS	AG1-X8	ApexΩ	Faraday	0.00726038	3.28773e-06	6.31362e-05	9.81673e-07
Neoma MS/MS	AG1-X8	ApexΩ	Faraday	0.00725337	3.07588e-06	6.30407e-05	1.29627e-06
Neoma MS/MS	AG1-X8	ApexΩ	Faraday	0.00725725	2.56393e-06	6.27166e-05	1.35266e-06
Neoma MS/MS	UTEVA	ApexΩ	Faraday	0.00725349	2.32601e-06	6.30721e-05	7.39447e-07
Neoma MS/MS	UTEVA	ApexΩ	Faraday	0.0072521	1.7589e-06	6.28956e-05	5.04574e-07
Neoma MS/MS	UTEVA	ApexΩ	Faraday	0.0072541	2.11572e-06	6.31332e-05	5.92354e-07
Neoma MS/MS	UTEVA	ApexΩ	Faraday	0.00725086	3.26045e-06	6.287e-05	9.11455e-07
Neoma MS/MS	UTEVA	ApexΩ	Faraday	0.00725111	2.41844e-06	6.28102e-05	9.76402e-07
Neoma MS/MS	UTEVA	ApexΩ	Faraday	0.00725438	2.23698e-06	6.29541e-05	6.30248e-07
Neoma MS/MS	none	Spray chamber	MIC	0.00731543	0.000228841	6.75104e-05	7.82479e-06
Neoma MS/MS	none	Spray chamber	MIC	0.0072902	8.41419e-05	6.90798e-05	8.09606e-06
Neoma MS/MS	none	Spray chamber	MIC	0.00728328	7.5033e-05	6.96461e-05	7.4045e-06
Neoma MS/MS	none	Spray chamber	MIC	0.00728392	7.37476e-05	7.2834e-05	6.86917e-06
Neoma MS/MS	none	Spray chamber	MIC	0.00725827	0.00014144	7.15829e-05	1.58838e-05
Neoma MS/MS	none	Spray chamber	MIC	0.00725074	0.000156169	6.87073e-05	1.45543e-05
Neoma MS/MS	none	Spray chamber	MIC	0.00723742	0.000144282	6.62709e-05	1.23727e-05
Neoma MS/MS	none	Spray chamber	MS/MS O2	0.013258	0.00012623	0.0877388	0.000471621
Neoma MS/MS	none	Spray chamber	MS/MS O2	0.0137785	0.000125028	0.0966226	0.000406856
Neoma MS/MS	none	Spray chamber	MS/MS O2	0.0141292	0.000154022	0.102802	0.000402548
Neoma MS/MS	none	Spray chamber	MS/MS O2	0.0148023	0.000142093	0.106819	0.000298436
Neoma MS/MS	none	Spray chamber	MS/MS O2	0.0150201	0.00016268	0.107973	0.00041345
Neoma MS/MS	none	Spray chamber	MS/MS O2	0.0151498	0.000176425	0.108845	0.000384499
Neoma MS/MS	none	Spray chamber	MS/MS O2	0.0153601	0.000139797	0.11871	0.000404157
Neoma MS/MS	none	Spray chamber	MS/MS O2	0.0154044	0.000143457	0.119081	0.000420551
Neoma MS/MS	none	Spray chamber	MS/MS O2	0.0154205	0.000140369	0.118774	0.000400757
